# Supplementary material for: Secretagogin protects Pdx1 from proteasomal degradation to control a transcriptional program required for β cell specification
Source: PubMed Central journal article supplement — Mol Metab. 2018 Jun 5;14:108–20. doi: 10.1016/j.molmet.2018.05.019 (PMC6034064; doi:10.1016/j.molmet.2018.05.019), 2018-06-05
Supplement: mmc4.pdf [file mmc4.pdf]

| <b>Antibody</b>               | <b>Source</b> | <b>Concentration</b>      | <b>Supplier</b>   | <b>Catalog number / Reference</b> |
|-------------------------------|---------------|---------------------------|-------------------|-----------------------------------|
| <b>Arx</b>                    | sheep         | 1:1,000                   | Novus Biologicals | AF7068                            |
| <b>glucagon</b>               | mouse         | 1:2,000                   | Sigma             | G2654                             |
| <b>insulin</b>                | guinea pig    | 1:500                     | DAKO              | A0564                             |
| <b>insulin</b>                | mouse         | 1:500                     | Cell Signaling    | #8138                             |
| <b>NeuroD1</b>                | mouse         | 1:500                     | DSHB              | AB60704                           |
| <b>Ngn3</b>                   | mouse         | 1:500                     | DSHB              | F25A1B3                           |
| <b>Nkx6.1</b>                 | rat           | 1:500                     | DSHB              | F55A10                            |
| <b>pancreatic polypeptide</b> | guinea pig    | 1:10,000                  | Linco Research    | #4041-01                          |
| <b>Pax6</b>                   | mouse         | 1:500                     | DSHB              | AB528427                          |
| <b>Pdx1</b>                   | rabbit        | 1:500                     | Cell Signaling    | D59H3                             |
| <b>secretagogen</b>           | rabbit        | 1:20,000 (histochemistry) | Dr. L. Wagner     | Wagner <i>et al.</i> , 2000       |
| <b>secretagogen</b>           | rabbit        | 1:5,000 (Western)         | Dr. L. Wagner     | Wagner <i>et al.</i> , 2000       |
| <b>somatostatin</b>           | rat           | 1:200                     | Dr. A. Cuello     | Cuello <i>et al.</i> , 1987       |
